# 1           **Extracellular matrix dependent regulation of Septin 7 in focal adhesions** 2           **promotes mechanosensing and response in fibroblasts.**

3  
4 Wesley Sturgess<sup>1,2</sup>, Swathi Packirisamy<sup>1</sup>, Rodina Geneidy<sup>1</sup>, Vinay Swaminathan<sup>1,2,\*</sup>

5  
6 <sup>1</sup>Division of Oncology, Department of Clinical Sciences, Lund University, Lund, Sweden.

7 <sup>2</sup>Wallenberg Centre for Molecular Medicine, Lund University, Lund, Sweden.

8 \*Correspondence to Vinay Swaminathan: [vinay.swaminathan@med.lu.se](mailto:vinay.swaminathan@med.lu.se)

## 9 10 **Abstract**

11  
12 **Fibroblasts are contractile adherent cells that maintain tissue homeostasis by**  
13 **sensing a wide array of changes in the extracellular matrix (ECM) and in**  
14 **response, regulate the physical and compositional properties of the ECM.**  
15 **These diverse cues are sensed by focal adhesions (FAs) that differentially**  
16 **couple changes in the ECM to the actomyosin machinery via modulation of**  
17 **integrin activation and the resultant recruitment of several proteins. One such**  
18 **protein is Septin-7 (Sept-7) that belongs to the septin family and has been**  
19 **found in FA proteomics and interactome studies. Sept-7 however, is not**  
20 **considered an FA protein and is thought to regulate and be regulated by actin**  
21 **outside of FAs. To reconcile these differences, here we used total internal**  
22 **reflection microscopy to image Sept-7 localization and dynamics at the cell-**  
23 **ECM interface and found that that ECM-mediated integrin activation in**  
24 **fibroblasts regulates the formation of spatially distinct higher order Sept-7**  
25 **structures at FA subpopulations. In and around FAs located in the perinuclear**  
26 **regions of the cell, ECM binding resulted in the formation and stabilization of**  
27 **Sept-7 bundles while ECM binding and complete integrin activation promoted**  
28 **the growth of FA-like elongated Sept-7 structures that dynamically associated**  
29 **with the core of peripheral FAs. Functionally, peripheral Sept-7 structures**  
30 **promoted the elongation of peripheral FAs while perinuclear Sept-7 bundles**  
31 **were critical in regulating the maturation and stabilization of perinuclear FAs.**  
32 **Due to this coupling between the ECM, integrin activation and regulation of**  
33 **Sept-7 structures, we found that Sept-7 is required for a wide range of ECM**  
34 **sensing functions in fibroblasts including modulating sensitivity to changes in**  
35 **ECM stiffness and density and in contributing to the cells ability to remodel**  
36 **the ECM. Collectively, our results show that Sept-7 is an FA protein that gets**  
37 **recruited and assembled in diverse higher order structures in an ECM**  
38 **dependent manner to differentially regulate FA subpopulations and promote**  
39 **mechanosensing and ECM remodelling functions in fibroblasts.**

## 40 41 **Introduction**

42  
43 The extracellular matrix (ECM) is a complex, multicomponent and dynamically  
44 changing non-cellular structure surrounding most cell types and tissues in our body.  
45 The proper regulation of the ECM's physical and biochemical properties is critical for  
46 several cellular processes, from cell specification and organogenesis to wound  
47 healing and immune responses and is altered in diseases such as cancer and  
48 atherosclerosis<sup>1-6</sup>. Fibroblasts are one of the primary cell types responsible for this  
49 regulatory role and do so by sensing changes in ECM properties and responding to  
50 these changes by producing, modifying, and remodelling the ECM<sup>7</sup>. Fibroblasts thus

51 need to have highly sensitive ECM-sensing mechanisms that allow it to sense small  
52 and distinct changes in the ECM environment that downstream trigger highly specific  
53 cellular responses. This important function is primarily mediated by integrin-based  
54 focal adhesions (FAs)<sup>8–11</sup>.

55

56 FAs comprise of the integrin family of receptors that indirectly couples the ECM to  
57 the cytoskeleton via a network of proteins called the adhesome. The complex  
58 regulation of recruitment and activity of adhesome proteins coupled to ECM-  
59 dependent integrin activation modulates the biophysical coupling between the ECM  
60 and the cytoskeleton and drives the sensing of different ECM cues as well as  
61 regulating downstream cellular responses<sup>12</sup>. While we now know of several  
62 mechanisms by which FAs can sense changes in ECM stiffness and architecture,  
63 mechanisms that fine tune the sensitivity and specificity of ECM sensing and cellular  
64 response is still not completely known. Proteomics using different FA isolation  
65 techniques and across different cell types have identified more than 2000 proteins in  
66 the adhesome<sup>13–15</sup>, and this has led to the hypothesis that many of these proteins  
67 could be responsible for this sensitivity and specificity. However, currently several of  
68 these proteins have no identified function in regulating FAs or in ECM sensing and  
69 cellular response. Additionally, since most of the proteomics studies rely on bulk  
70 isolation of FAs in the cell, information about composition of FA subpopulations within  
71 a cell based on location, maturation level or other subcellular states and whether  
72 these subpopulations play specific roles is not known.

73

74 To address these specific questions, we focussed on investigating the role of Sept-7  
75 which is one of the most enriched septins in the adhesome<sup>15</sup>. Septins are GTP-  
76 binding proteins that self-assemble into oligomers and polymers and form higher  
77 ordered structures either with linear or with curved filaments and rings<sup>16</sup>. Several  
78 studies have identified important roles for septins in regulating FA formation,  
79 maturation and disassembly<sup>17,18</sup>. In addition, Sept-7 containing bundles are found in  
80 proximity to FAs at the cell periphery<sup>17</sup> as well as in the perinuclear area along actin  
81 fibers where through interactions with F-actin, Sept-7 plays an important role in  
82 sensing of ECM stiffness<sup>19</sup>. However, in spite of Sept-7 being found in FA proteomic  
83 studies and evidence suggesting interactions between Sept-7 and other FA proteins,  
84 septins and specifically Sept-7 is considered to be excluded from FAs and its direct  
85 relationship with changing ECM cues and integrin activation is not known<sup>20–22</sup>.

86

87 We aimed to resolve these differences and understand the relationship between  
88 ECM sensing, integrin activation and of Sept-7 in FAs in this study. By using total  
89 internal reflection microscopy (TIRFM) to image the cell-ECM interface with high  
90 resolution as well as biochemical purification of adhesion complexes using ECM-  
91 coated beads, we found that Sept-7 forms distinct higher order structures that  
92 localize to FAs of mouse embryonic fibroblasts (MEFs). In addition to location  
93 specific distinct high order architecture, Sept-7 localization was also spatially and  
94 temporally distinctly localized within FA subpopulations. Sept-7 recruitment to the  
95 back of perinuclear FAs (in close proximity to the nucleus) and formation of higher  
96 order bundles was dependent on binding to the ECM protein fibronectin(FN) while  
97 FN binding and complete integrin activation was required to form elongated FA-like  
98 Sept-7 structures within the core of peripheral FAs (closer to the leading edge). To

99 test the function of Sept-7 in FA regulation, we downregulated Sept-7 expression in  
100 MEFs and found that this led to a dramatic loss in the perinuclear FA population by  
101 affecting perinuclear FA maturation rate and lifetime, but Sept-7 loss had only a  
102 minor effect on peripheral FA elongation. The loss of perinuclear FAs due to  
103 downregulation of Sept-7 correlated with significant loss of sensitivity to changes in  
104 FN density in MEFs as well as their ability to remodel and clear the FN. Taken  
105 together, our work identifies Sept-7 as an adhesome protein that via ECM dependent  
106 changes in its higher order architecture and localization regulates FA populations.  
107 Through these mechanisms, Sept-7 promotes the sensitivity of fibroblasts to regulate  
108 the physical properties of the ECM.

109

## 110 **Results**

111

### 112 **SEPT-7 localizes in spatially and temporally distinct patterns in FA sub-** 113 **populations.**

114

115 Based on microscopy-based localization data, Sept-7 is thought to be excluded from  
116 FAs which contradicts proteomics studies where Sept-7 is found to be enriched in  
117 FAs<sup>15,23,24</sup>. Since FA composition and function is highly dependent on the cell type,  
118 we sought to clarify these differences using fibroblasts which are highly contractile  
119 adherent cells that form large, dynamic FAs for motility and ECM sensing. To test if  
120 Sept-7 is associated with FAs, we first utilized an ECM coated magnetic bead-based  
121 assay that allows for isolation of the adhesion fraction and probed for proteins of  
122 interests using western blotting<sup>25-27</sup>. Briefly, fibronectin-coated beads were added to  
123 mouse embryonic fibroblasts (MEFs), incubated for 30 minutes, and then lysed  
124 (Figure S1A). The bead-bound fraction was then isolated, probed and compared to  
125 the total lysate. Blotting for the FA proteins vinculin, talin, paxillin and FAK as well as  
126 for tyrosine phosphorylated FAK and paxillin showed enrichment of these proteins in  
127 the bead fraction, while GAPDH was only present in the total lysate and absent in  
128 the bead fraction (Figure S1B). This verified our methodology and confirmed that the  
129 bead fraction was indeed the adhesion fraction. We then probed this adhesion  
130 fraction for Sept-7 along with the other FA proteins and found that Sept-7 is also  
131 significantly enriched in the adhesion fraction (Figure S1B). This suggests that Sept-  
132 7 is indeed associated with canonical FA proteins and is present in adhesions formed  
133 on ECM-coated beads.

134

135 We then sought to determine if Sept-7 also localizes to FAs formed at the cell-ECM  
136 substrate interface. We plated MEFs on glass-bottom dishes coated with 10 µg/ml  
137 fibronectin (FN) which allows for formation of robust integrin-dependent FAs that  
138 promote optimal ECM sensing for cell migration and mechanotransduction<sup>28</sup>. Cells  
139 were then fixed and co-immunostained for the FA protein paxillin, F-actin, and Sept-7  
140 and imaged using TIRFM (Figure 1A). Consistent with previous results, we found  
141 filamentous Sept-7 decorating ventral actin stress fibers near paxillin enriched FAs  
142 beneath and around the nucleus (Figure 1B, top panel)<sup>16</sup>. In addition, we also  
143 observed Sept-7 near the front of the cell in the lamellipodia as well as in FA-shaped  
144 structures in the lamella of the cell where it seemed to co-localize with the paxillin  
145 signal (Figure 1B, lower panel). The lamellipodia and lamella-localized Sept-7 signal  
146 while robust however was relatively weak compared to the signal from the  
147 filamentous structures found in proximity of the nucleus. Due to the 2 distinct  
148 structures of Sept-7 observed in the proximity of FAs, and to determine the exact

149 location of Sept-7 relative to F-actin and paxillin, we first classified the paxillin  
150 stained FAs as either perinuclear (connected to ventral actin stress fibers beneath  
151 the nucleus) or peripheral (located closer to the edge of the cell). We then generated  
152 a series of line scans across the FAs and plotted the average location of Sept-7 and  
153 F-actin relative to the location of paxillin within the FA (Figure 1C). This analysis  
154 showed that in perinuclear FAs, filamentous Sept-7 localized towards the rear of the  
155 FA with its average intensity peak outside of the FA and a partial overlap with paxillin.  
156 In contrast, at the peripheral FAs, puncta or elongated FA-like structures of Sept-7  
157 peaked more centrally to both the paxillin and the F-actin peak and terminated at the  
158 end of the FA (Figure 1C).

159  
160 This FA subpopulation-dependent localization and distinct higher order structures of  
161 Sept-7 suggested to us that the dynamics of Sept-7 in these populations could also  
162 be differentially coupled to these FA subpopulations. To investigate this, we co-  
163 expressed Sept-7-YFP with paxillin-mCherry in MEFs and imaged cells 4 hours after  
164 plating them on 10  $\mu\text{g/ml}$  FN coated glass-bottom dishes using TIRFM (Figure 1D  
165 and F, supplementary movies (SM1)). Time-lapse imaging confirmed distinct  
166 dynamics of localization at the peripheral FAs compared to perinuclear FAs. In  
167 perinuclear FAs, Sept-7 bundles localized to the back of the FA and remained stably  
168 associated during the entire lifetime of the perinuclear FA (Figure 1E). The time-  
169 period of localization of Sept-7 was coupled to the lifetime of the perinuclear FAs  
170 which were relatively long (at least  $> 10$  minutes). In contrast, Sept-7 puncta  
171 appeared along with newly formed peripheral FAs and followed the fate of the FAs,  
172 with puncta disappearing with FAs turning over or remaining stably associated with  
173 the FAs and maturing into larger structures in the lamellar region of the cell (Figure  
174 1G). Taken together, our data here shows that Sept-7 robustly localizes to FAs of  
175 adherent cells in distinct higher order structures with dynamics and FA localization  
176 dependent on the FA subpopulation within the cell.

### 177 178 **ECM-mediated integrin activation promotes formation of higher order Sept-7** 179 **structures and its association with FAs.**

180  
181 Our data on Sept-7 localization and the coupling of its dynamics to FA dynamics  
182 suggests a mechanistic link between Sept-7 recruitment to FAs, formation of higher  
183 order structures and integrin activation which regulates the formation and fate of  
184 FAs. To investigate this, we plated MEFs on glass-bottom dishes coated with poly-L-  
185 lysine (PLL-to prevent ECM mediated integrin activation), or 0.1  $\mu\text{g/ml}$  FN (to  
186 achieve low levels of integrin activation) and fixed and stained the cells for Sept-7  
187 and paxillin to compare with cells on 10  $\mu\text{g/ml}$  FN (Figure 2A). As expected, cells  
188 coated on PLL had no large perinuclear or peripheral FAs as stained by paxillin  
189 compared to cells on 10  $\mu\text{g/ml}$  FN, which was further confirmed by quantification of  
190 FA size which showed an expected ECM density dependent increase (Figure S2A,  
191 S2B). The loss of FAs on cells plated on PLL also coincided with loss of filamentous  
192 Sept-7 structures in the perinuclear region with Sept-7 instead forming puncta or  
193 rings throughout the cell (Figure 2A). Increasing the FN concentration to 0.1  $\mu\text{g/ml}$  FN  
194 resulted in formation of perinuclear Sept-7 bundles though peripheral Sept-7  
195 structures were still punctate-like unlike cells on 10  $\mu\text{g/ml}$  FN with more elongated  
196 structures (Figure 2A). To quantify these morphologies of Sept-7 structures, we  
197 measured Sept-7 co-alignment or anisotropy for the perinuclear bundles and the

198 length and shape of peripheral Sept-7 structures across these conditions (Figure 2B,  
199 S2C). This quantification showed a robust increase in perinuclear Sept-7 anisotropy  
200 which coincided with increase in perinuclear FA size upon ECM binding (Figure 2B,  
201 S2B). Peripheral Sept-7 structures on the other hand, only started getting elongated  
202 at the highest ECM density of 10 $\mu$ g/ml FN with no statistical difference between PLL  
203 and 0.1 $\mu$ g/ml FN (Figure 2B, S2C) which correlated with smaller peripheral FA size  
204 in 0.1 $\mu$ g/ml FN compared to 10 $\mu$ g/ml FN (Figure S2B). This suggested to us that the  
205 elongation of peripheral Sept-7 structures could be actomyosin driven since myosin  
206 II contractility in MEFs drives FA growth<sup>29</sup>. Unsurprisingly, inhibiting contractility using  
207 blebbistatin on MEFs plated on 10 $\mu$ g/ml FN or plating cells on polyacrylamide (PAA)  
208 gels of low rigidity (0.4KPa) resulted in loss of elongated peripheral Sept-7 structures  
209 as well as perinuclear Sept-7 bundles (Figure S2D). Thus, formation of higher order  
210 Sept-7 structures correlates with FA morphology and growth which is sensitive to  
211 changes in ECM binding, stiffness and actomyosin contractility.

212  
213 Next, we wanted to test the specific role of integrin activation in formation of Sept-7  
214 structures. To do so, we pre-treated cells with 1 mM MnCl<sub>2</sub> to shift surface expressed  
215 integrins to an extended (primed) conformation, and then plated them on 0.1 $\mu$ g/ml  
216 FN prior to fixing and immunostaining for paxillin and Sept-7 (Figure 2C)<sup>30,31</sup>. We  
217 found that treating MEFs with MnCl<sub>2</sub> resulted in a robust increase in FA size  
218 compared to untreated cells thus suggesting an increase in integrin activation at  
219 0.1 $\mu$ g/ml FN (Figure S2E). Analysis of Sept-7 structures showed that this increase in  
220 integrin activation resulted in an insignificant increase in perinuclear Sept-7  
221 anisotropy compared to cells on 0.1 $\mu$ g/ml FN (Figure 2D). In peripheral regions  
222 however, increased integrin activation on 0.1 $\mu$ g/ml led to a complete restoration of  
223 elongated Sept-7 structures to levels of 10  $\mu$ g/ml FN (Figure 2D). Taken together,  
224 these results show that ECM-mediated integrin activation differentially regulates the  
225 formation and coupling with FAs of distinct higher order Sept-7 structure on the  
226 ventral cell surface.

227  
228

### 229 **Sept-7 promotes the maturation and stabilization of perinuclear FAs.**

230

231 Due to the strong coupling between formation of higher order Sept-7 structures and  
232 FAs, we next investigated the role of Sept-7 in FA formation and dynamics. To do  
233 this, we used siRNAs to knockdown Sept-7 (Sept-7 KD) expression in MEFs (Figure  
234 S3A) and quantified FA morphodynamics using live TIRFM. To measure static FA  
235 properties, we fixed Sept-7 KD or non-targeting (NT) siRNA control cells plated on  
236 10 $\mu$ g/ml FN and stained for paxillin and F-actin (Figure 3A). Strikingly, we observed  
237 a near complete loss of large perinuclear FAs and associated ventral stress fibers in  
238 Sept-7 KD cells compared to NT controls, accompanied with a relatively less  
239 apparent effect on peripheral FAs (Figure 3A and B). Quantification of FA number  
240 and size confirmed our observations, showing a significant reduction in the number  
241 of perinuclear FAs in Sept-7 KD cells compared to NT control (Figure 3C). In addition  
242 to the reduced number, Sept-7 loss also resulted in the remaining perinuclear FAs to  
243 be significantly smaller compared to the controls (Figure 3D). Knocking down Sept-7  
244 had no effect on the average number of peripheral FAs though quantification  
245 revealed a slight reduction in peripheral FA size compared to the NT control (Figure

246 3C and D). To test if these effects of Sept-7 loss was specific to the ventral surface  
247 of the cell, we used 3D Structured Illumination Microscopy (SIM) to image the ventral  
248 actin stress fibers which are linked to perinuclear FAs, and the apical perinuclear  
249 actin cap which traverse the cell and attach to peripheral FAs (Figure S3C). In NT  
250 siRNA control cells, we again found robust actin stress fibers above and below the  
251 nucleus which were associated with Sept-7 bundles on the ventral side and smaller  
252 Sept-7 structures on the apical side (Figure S3B, left panel). Loss of Sept-7 however  
253 only affected the ventral actin stress fibers linked to perinuclear FAs resulting in loss  
254 of thick bundles with little or no effect on the apical perinuclear actin cap (Figure  
255 S3B, right panel).

256  
257 Next, due to the strong effect on perinuclear FAs, we asked if the significant  
258 reduction in the number and size of perinuclear FAs accompanying Sept-7 loss was  
259 due to reduction in formation of new perinuclear FAs or due to changes in the  
260 perinuclear FA lifetime and growth. To answer this, we transfected NT control and  
261 Sept-7 KD cells with paxillin-mCherry and imaged cells live using TIRFM (Figure 3E  
262 and F, supplementary movie SM2). Examination of timelapse movies revealed that in  
263 NT siRNA expressing cells, paxillin-mCherry localized to peripheral and perinuclear  
264 FAs and in peripheral FAs showed formation, turnover, and maturation dynamics  
265 similar to previous published reports<sup>28</sup>. Unlike peripheral FAs, perinuclear FAs in NT  
266 control MEFs were more stable with longer lifetimes with fewer new perinuclear FAs  
267 forming during the course of 10-20 minutes of image acquisition. In fact, perinuclear  
268 FAs formed prior to starting of acquisition lasted for longer than 10 minutes before  
269 disassembling (Figure 3E and F). In contrast, consistent with immunostaining data,  
270 in Sept-7 KD MEFs, paxillin-mCherry localized to peripheral FAs but was either  
271 completely absent in the perinuclear regions or present only in small perinuclear FA-  
272 like structures (Figure 3E, supplementary move SM3). While we couldn't observe  
273 any differences in peripheral FA dynamics within the temporal resolution of our  
274 acquisition, the existing perinuclear FAs in Sept-7 KD cells disassembled rapidly  
275 compared to NT controls (Figure 3F). In addition, we also observed formation of  
276 several perinuclear paxillin puncta during the course of 10-20 minutes of image  
277 acquisition that disassembled instead of maturing into larger perinuclear FAs (Figure  
278 3F). To quantify these dynamics, we used kymograph-based analysis and measured  
279 perinuclear FA formation rate and its observable average lifetime (Figure 3G and H).  
280 This analysis confirmed that while loss of Sept-7 resulted in a slight but not  
281 statistically significant increase in the formation rate of small perinuclear paxillin  
282 positive puncta, it led to a significant reduction in its minimum lifetime compared to  
283 NT controls. Thus, our data shows that ECM-dependent Sept-7 bundles promote the  
284 stabilization of perinuclear FAs by increasing the maturation rate and lifetime of  
285 perinuclear FAs in adherent cells.

### 286 287 **SEPT-7 enhances sensitivity of cells to changes in ECM cues and contributes** 288 **to the cell's ability to remodel the ECM.**

289  
290 Our results from above show that physical cues from the ECM can regulate the  
291 localization-specific architecture of Sept-7 and that this is differentially mediated  
292 through integrin activation. Additionally, we found that this localization-specific  
293 architecture of Sept-7 can in turn regulate the stability and dynamics of specific sub-  
294 populations of FAs. This led us to hypothesize that Sept-7 is critical for cellular  
295 functions that depend on FA-mediated sensing of changes in the ECM which rely on

296 integrin activation. To investigate this, we first tested the role of Sept-7 in sensing  
297 changes in ECM rigidity by plating MEFs on PAA gels with stiffness of 0.4KPa and  
298 60KPa and measuring changes in cell area across these conditions (Figure 4A). We  
299 first verified that increasing the stiffness from 0.4KPa to 60KPa did indeed result in  
300 increase in higher order Sept-7 structures in NT control MEFs which correlated with  
301 increase in cell spread area on 60KPa compared to 0.4 KPa PAA gels (Figure 4B,  
302 S3D). However, while Sept-7 KD MEFs spread to the same size on 0.4KPa gels  
303 compared to control MEFs, the cell spread area was smaller on 60 KPa compared to  
304 NT controls (Figure 4B). This was consistent with a previous study showing  
305 reduction in sensitivity of Sept-7 depleted cancer-associated fibroblasts to changes  
306 in ECM stiffness<sup>32</sup>.

307  
308 Since our results show that formation of higher-order Sept-7 bundles and its  
309 regulation of perinuclear FAs is dependent on ECM binding, we next tested if similar  
310 to sensitivity to ECM rigidity, Sept-7 was critical in allowing cells to respond to  
311 changes in ECM density or haptosensing<sup>33,34</sup>. We plated NT control and Sept-7 KD  
312 MEFs on dishes either coated with 0.1µg/ml FN which reduces Sept-7 bundle  
313 formation at perinuclear FAs and elongation in peripheral FAs or on 10 µg/ml FN and  
314 stained the cells for paxillin and F-actin 4 hours after plating (Figure 4C). Imaging for  
315 cell-spread area showed that both NT control and Sept-7 KD MEFs failed to spread  
316 properly on 0.1µg/ml FN while increasing the FN density to 10µg/ml FN led to  
317 increased spreading and formation of stress fibers across the cell in the NT control  
318 and increased spreading with a reduction in perinuclear FAs and organised stress  
319 fibers in the Sept-7 KD cells (Figure 4C). Quantification of cell area confirmed that  
320 Sept-7 KD MEFs were significantly smaller than NT MEFs on both low and high FN  
321 densities (Figure 4D). Thus, like ECM stiffness sensing, Sept-7 increases sensitivity  
322 of cellular responses to changes in ECM density.

323  
324 Lastly, based on the role of Sept-7 in formation of perinuclear FAs (Figure 3) and the  
325 known perinuclear localization of fibrillar FAs<sup>35,36</sup>, we asked if Sept-7 plays a role in  
326 ECM remodelling through regulation of perinuclear FAs. To test this, we first plated  
327 NT control and Sept-7 KD MEFs on 10 µg/ml FN and then fixed and immunostained  
328 the cells for FN and F-actin 8 hours after plating (to allow for ECM clearing in 2D).  
329 We then used epifluorescence microscopy to quantify the area of cleared FN at 8 hrs  
330 (Figure 4E). We observed areas of FN clearance in both conditions but the  
331 quantification of the average area of FN cleared per cell after 8 hours revealed a  
332 significant drop in ECM clearance in Sept-7 KD cells (Figure 4F). To test if this loss  
333 of FN remodelling was due to impeded cell migration or the ability of cells to remodel  
334 bound ECM, we tracked the migration of NT and Sept-7 KD cells labelled with SiR-  
335 DNA over 12 hrs. Quantification of cell migration speed revealed a slight reduction in  
336 migration speed in Sept-7 KD cells compared to NT control cells and no change in  
337 persistence or forward progress due to loss of Sept-7 (Figure S3E). However, the  
338 differences in cell migration speed were insufficient to account for differences in  
339 cleared FN between control and Sept-7 KD cells. This suggests that Sept-7  
340 promotes the ability of fibroblasts to remodel the ECM by promoting remodelling and  
341 cell migration.

342  
343 Taken together, these data shows that ECM and FA dependent localization of Sept-7  
344 is critical in enhancing sensitivity of fibroblasts to sense changes in ECM cues and  
345 promotes the cells' ability to respond and remodel the ECM.

## 346 Discussion

347

348 Our results here show that Sept-7 is an FA protein that gets assembled into different  
349 higher order structures in FAs in an ECM dependent manner in fibroblasts. In  
350 addition to differences in their architecture, these structures also differentially localize  
351 to FA subpopulations with bundles of Sept-7 localizing to perinuclear FAs while  
352 elongated FA-like Sept-7 structures localize to peripheral FAs. Besides localizing to  
353 FA subpopulations, our results show an important role for Sept-7 in regulating these  
354 subpopulations. Most significantly in perinuclear FAs, Sept-7 not only increases  
355 maturation rate but also contributes to the stabilization and growth of these FAs.  
356 Functionally, we find that downregulation of Sept-7 expression results in fibroblasts  
357 losing their sensitivity to changes in ECM cues including stiffness and density as well  
358 as their ability to physically remodel the ECM. Collectively, these results show that  
359 Sept-7 is an important protein of the FA adhesome that via assembly of higher order  
360 structures determines the sensitivity of fibroblasts to sense changes to their ECM  
361 environment and regulate their functional response to changes in ECM cues.

362

363 Previous studies on the role of Sept-7 in regulating FAs have attributed this role of  
364 Sept-7 to its ability to interact and regulate F-actin outside and in the vicinity of  
365 FAs<sup>37,38</sup>. A recent study showed that septins can also target non-centrosomal  
366 microtubules to FA sites to drive FA disassembly<sup>39</sup>. However, as mentioned earlier,  
367 proteomic studies find several septin isoforms as part of integrin-based adhesion  
368 complexes or the adhesome<sup>13</sup>, suggesting a more direct role for septins in FAs.  
369 Here, our data using adhesion isolation and TIRF imaging confirms that Sept-7 is in  
370 FAs. While the specific mechanisms of FA recruitment are not known, a recent study  
371 using pull-down and mass spectrometry identified talin as one possible binding  
372 partner<sup>21</sup>. Talin is a large multi-domain FA protein that links the cytoplasmic tails of  
373 integrins to F-actin. Under mechanical forces, talin opens up to reveal a large  
374 number of binding sites for other FA proteins<sup>40</sup>. Investigating whether Sept-7 is one  
375 such FA protein will be subject of further studies. Other potential binding partners for  
376 septins include vinculin, LM07 and ZNF185 which were identified in a separate  
377 proteomics study investigating the Sept-9 interactome in human fibroblasts<sup>41</sup>.  
378 Interestingly, since vinculin binding to talin is a tuneable mechanism required for  
379 ECM sensing, whether septins directly modulates vinculin-talin binding and thus  
380 enhances ECM sensitivity as we find here, should also be investigated further.

381

382 Our results here also lead to new questions about assembly of higher order septin  
383 structures. Septins form filaments by annealing hetero-oligomers which further form  
384 higher-order structures such as bundles and rings either through end-to-end binding  
385 or through lateral stacking<sup>42</sup>. Interestingly, Sept-7 is a component that is present in  
386 both fundamental units of septin oligomers, hexamers, and octamers and thus are an  
387 integral part of all higher order septin structures in a cell<sup>43,44</sup>. Our data on the ventral  
388 cell surface shows Sept-7 in 2 different structural forms, elongated FA-like in the  
389 peripheral FAs and longer bundles in the perinuclear region associated with  
390 perinuclear FAs. We show here that these structures while being dependent on the  
391 ECM have different reliance and sensitivity to integrin activation and ECM binding.  
392 The different form and mechanism of formation thus suggests distinct but ECM-  
393 dependent mechanisms of regulation of septin architecture on the ventral cell  
394 surface. Previous studies have shown that perinuclear septin bundles interact with  
395 perinuclear ventral actin stress fibers via Cdc42EP3 that stabilizes F-actin<sup>19,45</sup>.



396 However, the fact that septin bundles are spatially confined to the perinuclear ventral  
397 surface and excluded from peripheral regions suggests additionally players in this  
398 mechanism. In addition, our results show that Sept-7 bundles specifically target  
399 ventral actin stress fibers and seems to have no effect on the actin cap on top of the  
400 nucleus even though Sept-7 can localize there. Along with the role of ECM binding in  
401 this process, this suggests that the alternate mechanisms are specific to perinuclear  
402 FAs that regulate the building of Sept-7 bundles. Even lesser is known about the  
403 regulation of FA-like peripheral Sept-7 structures. Their dependency on complete  
404 integrin activation and associated contractility suggests that these structures are  
405 directly or indirectly dependent on binding to FA proteins that undergo conformational  
406 changes at high forces or are associated with highly mature FAs. Here again, binding  
407 to talin or vinculin can provide a potential mechanism since if there are multiple  
408 binding sites for Sept-7 on talin or Sept-7 associates with multiple vinculins bound to  
409 talin, this can result in formation of FA-like structures when talin is elongated.

410  
411 This study shows that loss of Sept-7 and the resultant loss in perinuclear FA function  
412 results in diminished ability of fibroblasts to sense and respond to biophysical  
413 changes in the ECM. A number of different mechanisms have been suggested by  
414 which cells tune their sensitivity and specificity to changes in ECM cues<sup>46</sup>. Our data  
415 here along with previous studies show that part of this mechanism relies on FA  
416 heterogeneity<sup>47-49</sup>. While FAs often look the same under the microscope when  
417 imaged with several canonical FA proteins, it is becoming clear that FAs within the  
418 cell are different from each other. However, very little is known about the specific  
419 roles of FA subpopulations in addition to their compositional and organizational  
420 differences. Our data shows that Sept-7 specifically plays a critical role in regulating  
421 perinuclear FAs and this correlates with the loss of sensitivity to ECM cues. Since  
422 the Sept-7 structures that coincides with this subpopulation are the perinuclear  
423 bundles, this suggests an overall organizational difference between perinuclear and  
424 peripheral FAs. It is also most likely that perinuclear FAs in our system are not one  
425 population but a few different populations of FAs with more specific functions that are  
426 currently unknown. Due to the effect of these perinuclear FAs on ECM remodelling, it  
427 is tempting to speculate that these perinuclear FAs are fibrillar adhesions that  
428 originate at the medial margins of classic FAs, changing protein composition and  
429 moving to the centre of the cell<sup>50</sup>. Paxillin however is thought to be excluded from  
430 fibrillar adhesions, which instead contain tensin-1 that links F-actin to the cytoplasmic  
431 tail of integrins<sup>36,51</sup>. This shows that while the perinuclear FAs in our study are not  
432 fibrillar adhesions, there are some functional overlaps that needs to be investigated  
433 further.

434 In conclusion our work proposes spatially and mechanistically distinct roles for Sept-  
435 7 in the dynamics and function of perinuclear and peripheral FA subpopulations.  
436 Furthermore, we propose that Sept-7 is a critical FA component that promotes ECM  
437 mechanosensing and regulates the ability of fibroblasts to remodel the ECM.

## 438 439 **Methods**

440  
441 **Cell culture.** Mouse embryonic fibroblasts were grown in Dulbecco's modified eagle  
442 medium (DMEM + glutaMAX, Gibco, 61965026), 10% foetal bovine serum heat  
443 activated (Gibco, 10270106) and Penicillin/Streptomycin (Gibco, 15140122). Cells  
444 were kept at 37°C and 5% CO<sub>2</sub>.

445 **Magnetic bead-based FA isolation assay.** Beads were functionalized with FN  
446 following previously described protocols<sup>24,26</sup>. Cells were cultured to 80 % confluency,  
447 washed with PBS, and incubated for 30 min in serum free media (SFM). FN coated  
448 beads were added to the cells for 30 min in SFM. Cells were lysed with NP-40 lysis  
449 buffer and lysates and bead fractions were collected and treated for 10 min with  
450 Benzonase (Sigma, E1014-25KU) to break up DNA/RNA. Bead fractions were then  
451 separated from lysates using a DynaMag-2 magnetic separator (Invitrogen, 12321D)  
452 and washed 3 times in NP-40 ready for Western blotting.

453  
454 **Western blotting.** Samples were resuspended in PBS and denatured with 4 x  
455 Laemmli sample buffer (Bio-Rad, 1610747) and boiled at 95°C for 10 min. Samples  
456 were treated with SDS-PAGE on a 4-12% Tris-Glycine gel (Invitrogen,  
457 XP041025BOX) and transferred to PVDF membrane (Biorad, 10026934) using  
458 Pierce transfer buffer (Invitrogen, PB7100). Membranes were blocked for 1 h in 3 %  
459 BSA (Sigma-Aldrich, A7906-100G) in TBS-T at room temperature. Primary Ab  
460 coupling was performed overnight at 4°C in 3 % BSA in TBS-T. Primary Abs used  
461 were: anti-mouse: Paxillin 1/3000 (BD Bioscience, 610052), Vinculin 1/800 (Sigma-  
462 Aldrich, V4505), focal adhesion kinase (FAK) 1/800 (Millipore, 06-534), anti-rabbit:  
463 Phospho-FAK 1/800 (Thermo Fisher, 44624G), phospho-paxillin 1/800 (Thermo  
464 scientific, 44-722G), Sept-7 1/800 (Thermo scientific, PA5-54755), GAPDH 1/5000  
465 (Sigma-Aldrich, PLA0125). Membranes were washed in TBS-T 3 x 10 min before  
466 incubating for 1 h at room temperature (RT) with secondary Abs in 3 % BSA in TBS-  
467 T followed by 3 x 10 min wash in TBS-T and 1 x 5 min TBS. Secondary Abs used  
468 were: Starbright™ Blue 520 Goat Anti-Rabbit IgG (Biorad, 12005869), Goat anti-  
469 mouse IgG StarBright™ Blue 700 (Biorad, 12004158). All imaging was performed  
470 using a Bio-Rad ChemiDoc MP system.

471  
472 **Immunostaining sample prep.** Glass bottom dishes were coated with 10 µg/ml FN  
473 overnight in the fridge. Cells were plated for 4 hr at 37°C in DMEM before fixing for  
474 staining and imaging. For ECM ligand concentration experiments glass bottom  
475 dishes were coated with 0.1 or 10 µg/ml FN for 1 hr at 37°C, and then blocked in the  
476 fridge overnight in 2% BSA in TBS-T. For ECM stiffness experiments, polyacrylamide  
477 gels on 18 mm coverslips with a Young's modulus of 0.4 or 60 Kpa were prepared  
478 and functionalized following a previously described protocol<sup>52</sup> and coated with 10  
479 µg/ml FN.

480  
481 **Integrin activation assay.** Glass bottom dishes were coated with 0.1 or 10 µg/ml  
482 FN in PBS, or PLL, for 1 hr at 37°C. Dishes were then rinsed with PBS and left  
483 overnight in 2% BSA in TBS-T and then rinsed with PBS. Cells were preincubated  
484 with 1 mM MnCl before plating on FN coated dishes for 4 hr at 37°C in DMEM and  
485 then fixed for staining and imaging

486  
487 **Transfection.** To analyze FA and Sept-7 dynamics, cells were transfected with 5 µg  
488 or 2,5 µg (single or co-transfection respectively) paxillin-mCherry, and/or Sept-7-YFP  
489 using Lipofectamine™ 3000 Transfection Reagent (ThermoFisher, L3000001). Cells  
490 were used 48 hr after transfection.  
491 For Sept-7 knockdown experiments cells were transfected using with 20pM non-  
492 targeting (Dharmacon, D-001810-10-05), or Sept-7 targeting (Dharmacon, L-042160-  
493 01-005) siRNA. Cells were used 48 hr after transfection. For co-transfection with

494 siRNA and plasmid, 5 µg paxillin-mCherry was transfected 24hr after siRNA  
495 transfection. Cells were used for experiments 24hr later.

496

497 **Immunostaining.** Cells were fixed in 4 % paraformaldehyde (Thermo scientific,  
498 28906) in cytoskeleton buffer (CB) for 20 min at 37°C. Cells were permeabilised in  
499 0.5 % Triton-x (Alfa Aesar, A16046) in CB for 5 min, washed with 0.1 M Glycine  
500 (Sigma, 50046-250G) in CB for 10 min and then washed 3 times with TBS, all at RT,  
501 and then blocked with 2% BSA in TBS-T for 1 hr. Incubation of Primary Abs: Paxillin  
502 1/400 (BD Bioscience, 610052), Sept7 1/400 (Thermo scientific, PA5-54755), FN  
503 1/400 (Sigma-Aldrich, F3648-100UL) in 2% BSA in TBS-T was performed overnight  
504 at 4°C. Subsequent washes and incubations were in TBS-T. Cells were washed 3 x 5  
505 min, incubated with secondary Ab: goat anti-mouse IgG 647 nm 1/400 (Invitrogen,  
506 A1101), goat anti-rabbit IgG 568 nm 1/400 (Invitrogen, A11010) and phalloidin 488  
507 1/400 (Invitrogen, A12380) for 1 h in the dark at RT and then washed 3 x 5 min.  
508 Gels were mounted on slides with mounting media (Thermo scientific, P36980).

509 **Total internal reflection microscopy (TIRFM).** Images were acquired using total  
510 internal reflection microscope on a Nikon Eclipse Ti microscope with TIRF APO 100x  
511 1.49 N.A. objective. Laser lines used were 488, 561, and 647 nm and emission and  
512 excitation filters were: GFP (mirror: 498–537 nm and 565–624 nm; excitation: 450–  
513 490 nm and 545–555 nm; emission: peak 525 nm, range 30 nm) and mCherry  
514 (mirror: 430–470, 501–539, and 567–627 nm; excitation: 395–415, 475–495, and  
515 540–560 nm; emission: peak 605 nm, range 15 nm), or Continuous STORM (mirror:  
516 420–481, 497–553, 575–628, and 667–792 nm; excitation: 387–417, 483–494, 557–  
517 570, and 636–661 nm; emission: 422–478, 502–549, 581–625, and 674–786 nm).  
518 Images were acquired using a Teledyne Photometrics 95B 22 mm camera. For live  
519 cell imaging cells were kept at 37°C and images were captured every 10 – 30 sec  
520 over a 20 min timeframe.

521 **Confocal microscopy.** Images were acquired using a Nikon Confocal A1RHD  
522 microscope with 488-, 561-, and 640- nm laser lines for F-actin, Sept-7, and paxillin  
523 respectively using a 60x Apochromal oil objective (N.A: 1.42).

524 **Structured illumination microscopy (SIM).** Image acquisition was performed using  
525 a Nikon N-SIM microscope with an LU-NV laser, and a CFR SR HP apochromat  
526 TIRF 100x oil objective (N.A: 1.49), 488 and 568 laser lines were used for F-actin  
527 Sept-7 respectively. An ORCA-flash 4.0 sCMOS camera (Hamamatsu Photonics  
528 K.K) was used and the images were reconstructed using in-built Nikon SIM software  
529 on NIS elements AR (NIS-A 6D and N-SIM analysis).

530 **Epifluorescence imaging.** Image acquisition was performed using a Nikon Eclipse  
531 Ti microscope with an APO 20x 0.75 N.A. objective. Excitation and emission light  
532 was passed through a FITC (Exc. 457-487nm, Em. 503-538nm) or Cy5 (Exc. 590-  
533 645nm, Em. 659-736 nm) Semrock filter cube. Images were acquired on a Nikon  
534 DS-Qi2 CMOS camera. For live cell imaging, an environmental chamber (Okolab)  
535 was used to keep samples in a humidified 37°C and 5 % CO<sub>2</sub> atmosphere. Cells  
536 were imaged every 5 min for 12 hr.

537 **Image analysis.** *(All performed in Fiji unless stated otherwise)*

538 *Cell area.* All cell area analysis was performed on 20x epifluorescence images using  
539 manually created pipeline written in Julia (version 1.6), where Otsu thresholding was  
540 used to attain cell size.

541

542 *Colocalization plots* (Figure 1C) were acquired by creating line plots of the average  
543 intensity values along cross sections of perinuclear or peripheral FAs of background  
544 subtracted images. Data was normalized using  $\frac{i - \min i}{\max[i - \min i]}$  where  $i$  denotes intensity.

545

546 *FA morphology.* ROIs of perinuclear and peripheral FAs from background subtracted  
547 100x TIRFM images were created. A median filter and Otsu thresholding was  
548 applied, and a mask created. FA sizes and numbers were then calculated using the  
549 built-in function to analyze particles. FA sizes were filtered to encompass a range of  
550  $0.20 \mu\text{m}^2 < \text{FA} < 20 \mu\text{m}^2$ .

551

552 *FA dynamics.* Kymographs were created of perinuclear FA sites from background  
553 subtracted 100x live cell movies, which were then used to measure minimum FA  
554 lifetimes and formation rates.

555

556 *ECM remodeling.* A manual threshold was used on fibronectin labeled  
557 epifluorescence 20x images to segment areas of the coverslips that were clear of  
558 fibronectin signal. A mask was created, and the segmented area calculated using the  
559 analyze particle's function, which was then divided by the number of cells in the  
560 image to give an average area of FN cleared per cell.

561

562 *Cell migration.* Cell migration analysis was performed using the TrackMate plug-in<sup>53</sup>  
563 using 20x epifluorescence timelapse images of cells labelled with the nuclear marker  
564 SiR-DNA (Tebubio, SC007). Cells were imaged over 12 hr and cells that were  
565 continually tracked for a minimum 8hrs were included in the analysis.

566 **Statistical analysis.** All data was analysed using GraphPad Prism (version 10).  
567 Non-normally distributed data was analysed using a Mann-Whitney U test. Kruskal-  
568 Wallis test with Dunns post hoc was used for data with multiple comparisons. Dot  
569 plots or violin plots were used for data display, with orange horizontal lines showing  
570 medians.

571 **Acknowledgements.** We thank Dr. Pontus Nordenfelt, Dr. Johan Malmström, Dr.  
572 Sebastian Wasserstrom and all the members of laboratory of cell and molecular  
573 mechanobiology (LCMM) for their discussion and support. The Sept-7 YFP plasmid  
574 was a kind gift from Dr. Helge Ewers at the Freie Universität Berlin. Johannes Kumra  
575 Ahnlide and Valeriia Grudtsyna are specially acknowledged for the help in  
576 developing code and maintaining image storage servers. Lund University Bioimaging  
577 Centre (LBIC) at Lund University is gratefully acknowledged for providing  
578 experimental resources. This research was funded by the Knut and Alice Wallenberg  
579 foundation (WS, VS), Wallenberg Centre for Molecular Medicine,  
580 Lund);Cancerfonden (VS, 19 0445 Pj and 22 2398 Pj Projekt grant) and The Royal  
581 Physiographic Society of Lund (WS, App: 43178).

582

- 583 1. Cruz Walma, D. A. & Yamada, K. M. The extracellular matrix in development.  
584 *Dev.* **147**, (2020).
- 585 2. Cao, H. *et al.* Substrate stiffness regulates differentiation of induced pluripotent  
586 stem cells into heart valve endothelial cells. *Acta Biomater.* **143**, 115–126  
587 (2022).
- 588 3. Li, Y. *et al.* dCas9-Based PDGFR- $\beta$  Activation ADSCs Accelerate Wound  
589 Healing in Diabetic Mice through Angiogenesis and ECM Remodeling. *Int. J.*  
590 *Mol. Sci.* **24**, 5949 (2023).
- 591 4. Dai, H. *et al.* RhoA inhibitor suppresses the production of microvesicles and  
592 rescues high ventilation induced lung injury. *Int. Immunopharmacol.* (2019)  
593 doi:10.1016/j.intimp.2019.03.059.
- 594 5. Bonnans, C., Chou, J. & Werb, Z. Remodelling the extracellular matrix in  
595 development and disease. *Nat. Rev. Mol. Cell Biol.* 2014 1512 **15**, 786–801  
596 (2014).
- 597 6. Patel, P., Rai, V. & Agrawal, D. K. Role of oncostatin-M in ECM remodeling  
598 and plaque vulnerability. *Mol. Cell. Biochem.* **478**, 2451–2460 (2023).
- 599 7. DeLeon-Pennell, K. Y., Barker, T. H. & Lindsey, M. L. Fibroblasts: The arbiters  
600 of extracellular matrix remodeling. *Matrix Biol.* **91–92**, 1–7 (2020).
- 601 8. Gupton, S. L. & Waterman-Storer, C. M. Spatiotemporal Feedback between  
602 Actomyosin and Focal-Adhesion Systems Optimizes Rapid Cell Migration. *Cell*  
603 **125**, 1361–1374 (2006).
- 604 9. Taneja, N. *et al.* Focal adhesions control cleavage furrow shape and spindle tilt  
605 during mitosis. *Sci. Reports* 2016 61 **6**, 1–11 (2016).
- 606 10. Jeong, K. *et al.* Nuclear focal adhesion kinase controls vascular smooth  
607 muscle cell proliferation and neointimal hyperplasia through GATA4-mediated  
608 cyclin D1 transcription. *Circ. Res.* **125**, 152–166 (2019).
- 609 11. Kilinc, A. N., Han, S., Barrett, L. A., Anandasivam, N. & Nelson, C. M. Integrin-  
610 linked kinase tunes cell-cell and cell-matrix adhesions to regulate the switch  
611 between apoptosis and EMT downstream of TGF $\beta$ 1. *Mol. Biol. Cell* **32**, 402–  
612 412 (2021).
- 613 12. Kechagia, J. Z., Ivaska, J. & Roca-Cusachs, P. Integrins as biomechanical  
614 sensors of the microenvironment. *Nature Reviews Molecular Cell Biology*  
615 (2019) doi:10.1038/s41580-019-0134-2.
- 616 13. Horton, E. R. *et al.* Definition of a consensus integrin adhesome and its  
617 dynamics during adhesion complex assembly and disassembly. *Nat. Cell Biol.*  
618 (2015) doi:10.1038/ncb3257.
- 619 14. Schiller, H. B., Friedel, C. C., Boulegue, C. & Fäsingssler, R. Quantitative  
620 proteomics of the integrin adhesome show a myosin II-dependent recruitment  
621 of LIM domain proteins. *EMBO Rep.* (2011) doi:10.1038/embor.2011.5.
- 622 15. Robertson, J. *et al.* Defining the phospho-adhesome through the  
623 phosphoproteomic analysis of integrin signalling. *Nat. Commun.* 2015 61 **6**, 1–  
624 13 (2015).
- 625 16. Martins, C. S. *et al.* Human septins organize as octamer-based filaments and  
626 mediate actin-membrane anchoring in cells. *J. Cell Biol.* **222**, (2023).
- 627 17. Merenich, D. *et al.* Septins guide noncentrosomal microtubules to promote  
628 focal adhesion disassembly in migrating cells. *Mol. Biol. Cell* **33**, (2022).
- 629 18. Kho, M., Hladyschau, S., Tsygankov, D. & Nie, S. Coordinated regulation of  
630 Cdc42ep1, actin, and septin filaments during neural crest cell migration. *Front.*  
631 *Cell Dev. Biol.* **11**, (2023).
- 632 19. Calvo, F. *et al.* Cdc42EP3/BORG2 and Septin Network Enables Mechano-

- 633 transduction and the Emergence of Cancer-Associated Fibroblasts. *Cell Rep.*  
634 **13**, 2699–2714 (2015).
- 635 20. Lam, M. & Calvo, F. Regulation of mechanotransduction: Emerging roles for  
636 septins. *Cytoskeleton* **76**, 115–122 (2019).
- 637 21. Gough, R. E. *et al.* Talin mechanosensitivity is modulated by a direct  
638 interaction with cyclin-dependent kinase-1. *J. Biol. Chem.* **297**, (2021).
- 639 22. Spiliotis, E. T. & Nakos, K. Cellular functions of actin- and microtubule-  
640 associated septins. *Curr. Biol.* **31**, R651–R666 (2021).
- 641 23. Schiller, H. B. *et al.*  $\beta$ 1- and  $\alpha$ v-class integrins cooperate to regulate myosin II  
642 during rigidity sensing of fibronectin-based microenvironments. *Nat. Cell Biol.*  
643 *2013 156* **15**, 625–636 (2013).
- 644 24. Jones, M. C. *et al.* Isolation of Integrin-Based Adhesion Complexes. *Curr.*  
645 *Protoc. Cell Biol.* **66**, 9.8.1-9.8.15 (2015).
- 646 25. Plopper, G. & Ingber, D. E. Rapid induction and isolation of focal adhesion  
647 complexes. *Biochem. Biophys. Res. Commun.* (1993)  
648 doi:10.1006/bbrc.1993.1662.
- 649 26. Sturgess, W. & Swaminathan, V. Focal Adhesion Isolation Assay Using ECM-  
650 Coated Magnetic Beads. in *The Integrin Interactome: Methods and Protocols*  
651 (ed. Vicente-Manzanares, M.) 39–44 (Springer US, 2021). doi:10.1007/978-1-  
652 0716-0962-0\_4.
- 653 27. Millon-Frémillon, A., Aureille, J. & Guilluy, C. Analyzing cell surface adhesion  
654 remodeling in response to mechanical tension using magnetic beads. *J. Vis.*  
655 *Exp.* (2017) doi:10.3791/55330.
- 656 28. Swaminathan, V., Fischer, R. S. & Waterman, C. M. The FAK-Arp2/3  
657 interaction promotes leading edge advance and haptosensing by coupling  
658 nascent adhesions to lamellipodia actin. *Mol. Biol. Cell* **27**, 1085–1100 (2016).
- 659 29. Kuo, J. C., Han, X., Hsiao, C. Te, Yates, J. R. & Waterman, C. M. Analysis of  
660 the myosin-II-responsive focal adhesion proteome reveals a role for  $\beta$ -Pix in  
661 negative regulation of focal adhesion maturation. *Nat. Cell Biol.* *2011 134* **13**,  
662 383–393 (2011).
- 663 30. Bridges, A. A., Jentsch, M. S., Oakes, P. W., Occhipinti, P. & Gladfelter, A. S.  
664 Micron-scale plasma membrane curvature is recognized by the septin  
665 cytoskeleton. *J. Cell Biol.* **213**, 23–32 (2016).
- 666 31. Schumacher, S. *et al.* Structural insights into integrin  $\alpha$ 5 $\beta$ 1 opening by  
667 fibronectin ligand. *Sci. Adv.* **7**, (2021).
- 668 32. Calvo, F. *et al.* Cdc42EP3/BORG2 and Septin Network Enables Mechano-  
669 transduction and the Emergence of Cancer-Associated Fibroblasts. *Cell Rep.*  
670 **13**, 2699 (2015).
- 671 33. Wu, C. *et al.* Arp2/3 is critical for lamellipodia and response to extracellular  
672 matrix cues but is dispensable for chemotaxis. *Cell* **148**, 973–987 (2012).
- 673 34. Palecek, S. P., Loftust, J. C., Ginsberg, M. H., Lauffenburger, D. A. & Horwitz,  
674 A. F. Integrin-ligand binding properties govern cell migration speed through  
675 cell-substratum adhesiveness. *Nat.* *1997 3856616* **385**, 537–540 (1997).
- 676 35. Pankov, R. *et al.* Integrin Dynamics and Matrix Assembly Tensin-Dependent  
677 Translocation of  $\alpha$ 5 $\beta$ 1 Integrins Promotes Early Fibronectin Fibrillogenesis. *J.*  
678 *Cell Biol.* **148**, 1075–1090 (2000).
- 679 36. Geiger, B. & Yamada, K. M. Molecular Architecture and Function of Matrix  
680 Adhesions. *Cold Spring Harb. Perspect. Biol.* **3**, a005033 (2011).
- 681 37. Kho, M., Hladyschau, S., Tsygankov, D. & Nie, S. Coordinated regulation of  
682 Cdc42ep1, actin, and septin filaments during neural crest cell migration. *Front.*

- 683 *cell Dev. Biol.* **11**, (2023).
- 684 38. Mavrakis, M. *et al.* Septins promote F-actin ring formation by crosslinking actin  
685 filaments into curved bundles. *Nat. Cell Biol.* 2014 164 **16**, 322–334 (2014).
- 686 39. Merenich, D. *et al.* Septins guide noncentrosomal microtubules to promote  
687 focal adhesion disassembly in migrating cells. *Mol. Biol. Cell* **33**, (2022).
- 688 40. Zhao, Y., Lykov, N. & Tzeng, C. Talin-1 interaction network in cellular  
689 mechanotransduction (Review). *Int. J. Mol. Med.* **49**, (2022).
- 690 41. Hecht, M., Rösler, R., Wiese, S., Johnsson, N. & Gronemeyer, T. An  
691 Interaction Network of the Human SEPT9 Established by Quantitative Mass  
692 Spectrometry. *G3 Genes|Genomes|Genetics* **9**, 1869–1880 (2019).
- 693 42. Meseroll, R. A., Howard, L. & Gladfelter, A. S. Septin ring size scaling and  
694 dynamics require the coiled-coil region of Shs1p. *Mol. Biol. Cell* **23**, 3391  
695 (2012).
- 696 43. Mendonça, D. C. *et al.* A revised order of subunits in mammalian septin  
697 complexes. *Cytoskeleton (Hoboken)*. **76**, 457–466 (2019).
- 698 44. Soroor, F. *et al.* Revised subunit order of mammalian septin complexes  
699 explains their in vitro polymerization properties. *Mol. Biol. Cell* **32**, 289–300  
700 (2021).
- 701 45. Farrugia, A. J. *et al.* CDC42EP5/BORG3 modulates SEPT9 to promote  
702 actomyosin function, migration, and invasion. *J. Cell Biol.* **219**, (2020).
- 703 46. Swaminathan, V. & Gloerich, M. Decoding mechanical cues by molecular  
704 mechanotransduction. *Curr. Opin. Cell Biol.* **72**, 72–80 (2021).
- 705 47. Malik-Sheriff, R. S., Imtiaz, S., Grecco, H. E. & Zamir, E. Diverse patterns of  
706 molecular changes in the mechano-responsiveness of focal adhesions. *Sci.*  
707 *Rep.* (2018) doi:10.1038/s41598-018-20252-0.
- 708 48. Hernandez-Varas, P., Berge, U., Lock, J. G. & Strömblad, S. A plastic  
709 relationship between vinculin-mediated tension and adhesion complex area  
710 defines adhesion size and lifetime. *Nat. Commun.* 2015 61 **6**, 1–13 (2015).
- 711 49. Zamir, E. & Geiger, B. Molecular complexity and dynamics of cell-matrix  
712 adhesions. *J. Cell Sci.* **114**, 3583–3590 (2001).
- 713 50. Zamir, E. *et al.* Dynamics and segregation of cell–matrix adhesions in cultured  
714 fibroblasts. *Nat. Cell Biol.* 2000 24 **2**, 191–196 (2000).
- 715 51. Barber-Pérez, N. *et al.* Mechano-responsiveness of fibrillar adhesions on  
716 stiffness-gradient gels. *J. Cell Sci.* **133**, (2020).
- 717 52. Lakins, J. N., Chin, A. R. & Weaver, V. M. Exploring the link between human  
718 embryonic stem cell organization and fate using tension-calibrated  
719 extracellular matrix functionalized polyacrylamide gels. *Methods Mol. Biol.*  
720 (2012) doi:10.1007/978-1-61779-980-8-24.
- 721 53. Ershov, D. *et al.* TrackMate 7: integrating state-of-the-art segmentation  
722 algorithms into tracking pipelines. *Nat. Methods* 2022 197 **19**, 829–832 (2022).

723

## 724 **Supplementary Movie Legends.**

725

726 **Supplementary movie SM1.** TIRFM time-lapse imaging of MEFs transfected with  
727 Sept-7 YFP (grey) and mCherry Paxillin (magenta). Images taken every 10 seconds  
728 (elapsed time shown in min:s). Insets show perinuclear (second panel) and  
729 peripheral (right-most panel) regions of the cell. Montages in Figure 1D and 1F as  
730 well as line scans in 1E and 1G correspond to this movie.

731

732 **Supplementary movie SM2.** TIRFM time-lapse imaging of MEFs transfected with  
733 NT siRNA control for 48 hours and mCherry Paxillin (grey) prior to imaging. Images  
734 taken every 10 seconds (elapsed time shown in min:s). Inset shows perinuclear FA  
735 dynamics. Movie corresponds to Figure 3F (top panel). LUT inverted.

736

737 **Supplementary movie SM3.** TIRFM time-lapse imaging of MEFs transfected with  
738 Sept-7 targeting siRNA for 48 hours and mCherry Paxillin (grey) prior to imaging.  
739 Images taken every 10 seconds (elapsed time shown in min:s). Inset shows  
740 perinuclear FA dynamics. Movie corresponds to Figure 3F (bottom panel). LUT  
741 inverted.



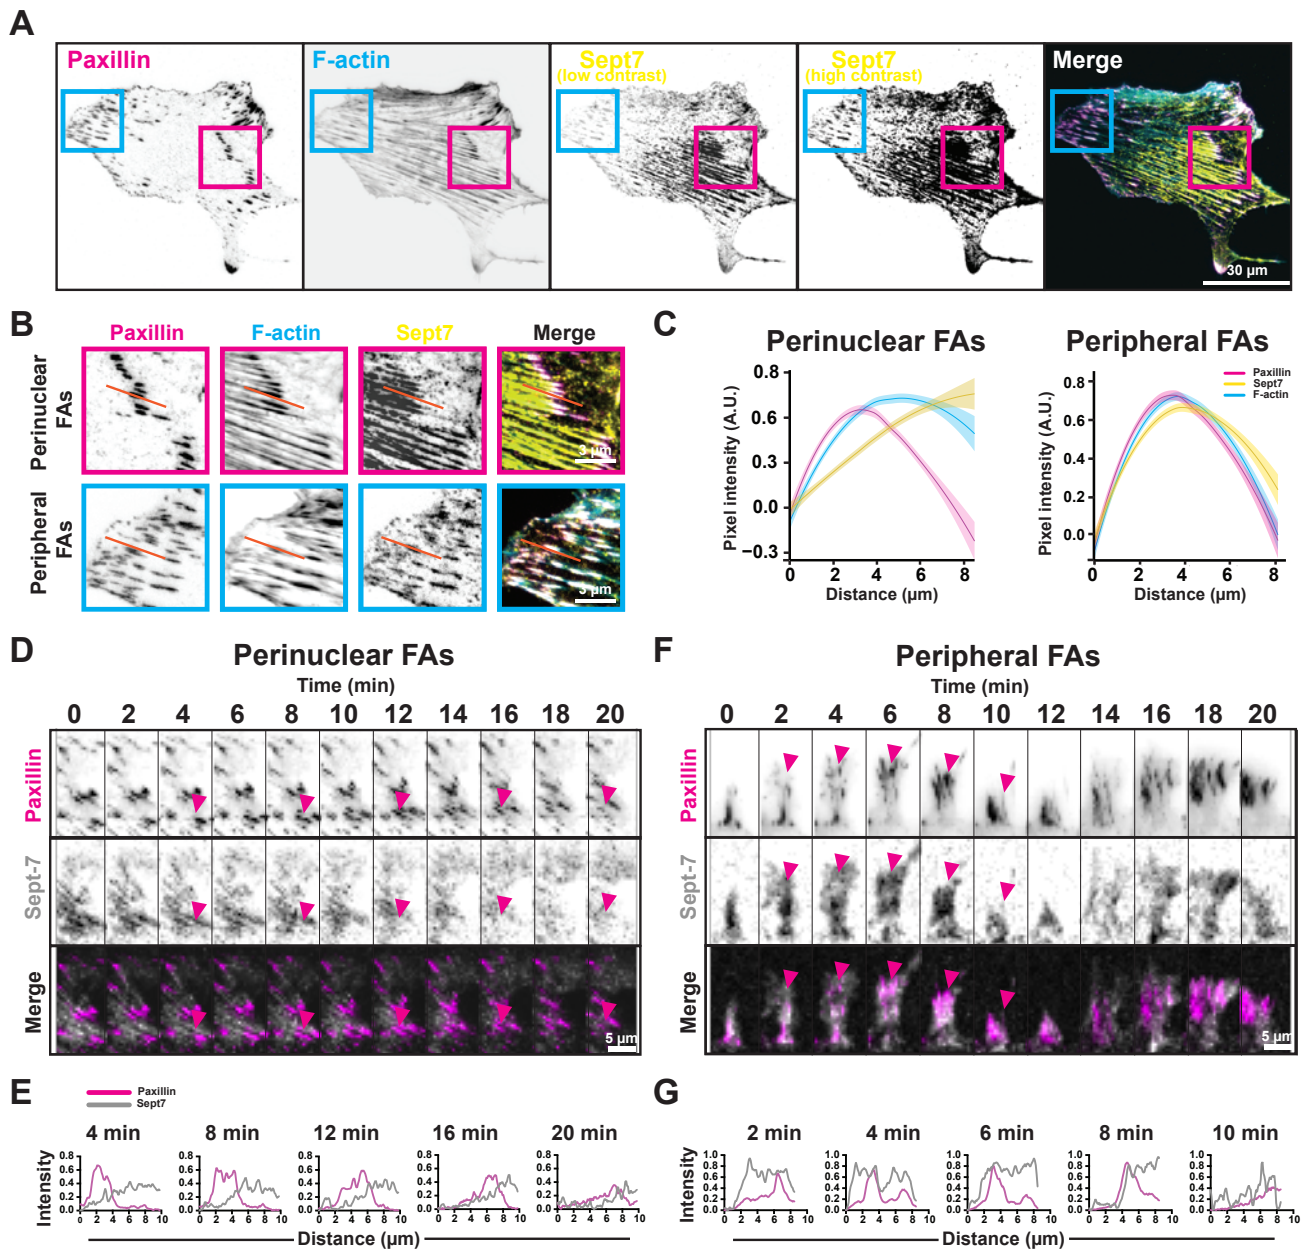

**Figure 1. Sept-7 localizes in spatially and temporally distinct patterns in FA sub-populations.**

(A) Representative TIRFM images of MEFs stained with paxillin (magenta), F-actin (cyan), and Sept-7, (yellow, low, and high contrast). Magenta and cyan boxes highlight perinuclear and peripheral FAs respectively. (B) Insets of perinuclear (magenta), and peripheral (cyan) FAs from (A), red lines represent example FA line scans. (C) Curve plots showing normalized line scan intensities of paxillin, Sept-7, and F-actin, for perinuclear(left) and peripheral(right) FAs, shaded curves represent SD, ( $n = 5$  cells, 10–12 line scans per adhesion type). (D and F) Montages taken from live TIRFM movie, of perinuclear and peripheral FAs from MEFs co-transfected with mCherry-paxillin (magenta, top) and YFP-Sept-7 (grey, middle), and merged channels (bottom), magenta arrows highlight FAs over time. (E and G) line plots showing colocalization of paxillin (magenta) and Sept-7 (grey) at FAs overtime indicated by arrows in (D and F).

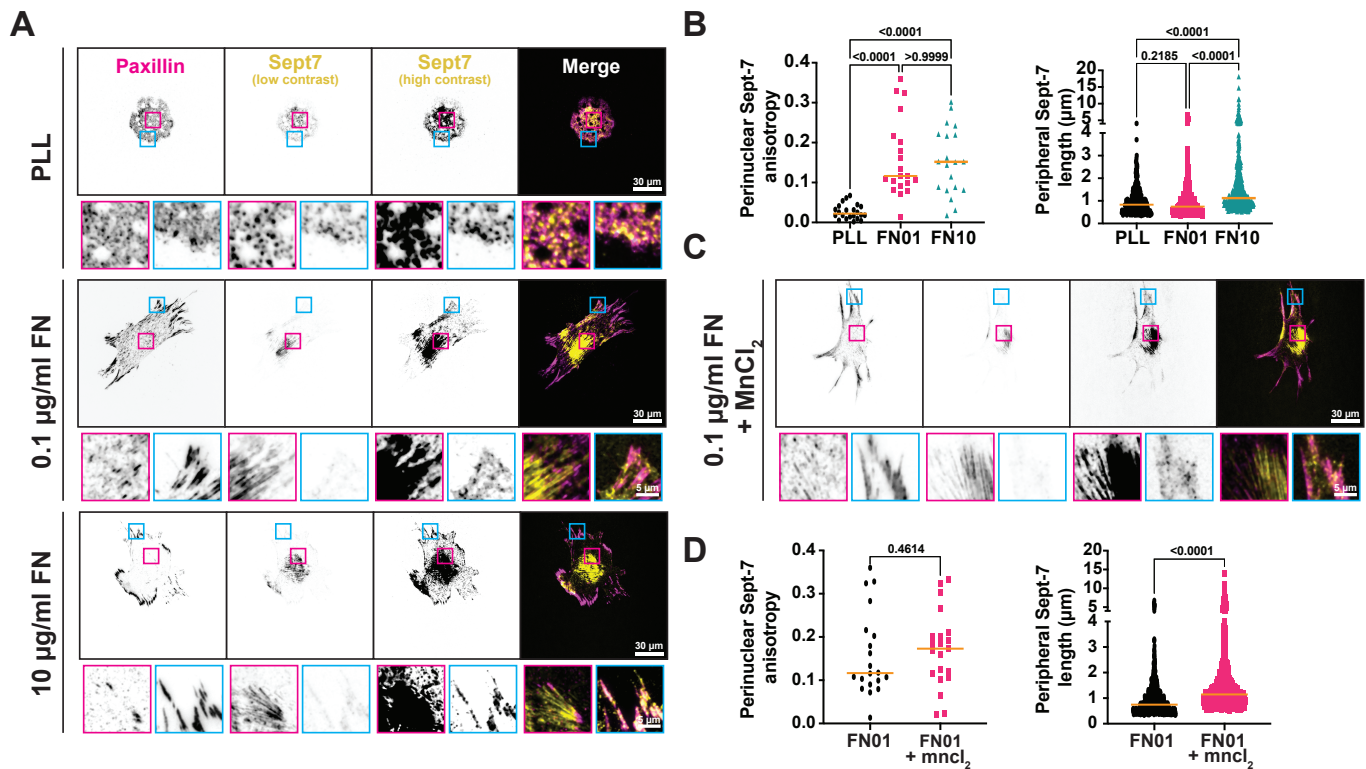

**Figure 2. ECM-mediated Integrin activation promotes formation of filamentous perinuclear Sept-7 and its association with FAs.**

(A) TIRFM images showing paxillin (magenta), Sept-7 (yellow, low, and high contrasts), and merge in MEFs plated on PLL, 0.1  $\mu\text{g/ml}$  FN, and 10  $\mu\text{g/ml}$  FN, magenta and cyan insets highlight perinuclear and peripheral FAs respectively. (B) Quantification of Sept-7 anisotropy,  $n = 20 - 22$  cells, and Sept-7 peripheral structure major axis length,  $n = 327 - 683$  puncta of MEFs plated on PLL, 0.1  $\mu\text{g/ml}$  FN, and 10  $\mu\text{g/ml}$  FN, with Kruskal-Wallis and Dunns multiple comparisons test. (C) TIRFM images show paxillin (magenta), Sept-7 (yellow, low, and high contrasts), and merge of MEFs plated on 0.1  $\mu\text{g/ml}$  FN + 1mM  $\text{MnCl}_2$ , magenta and cyan insets highlight perinuclear and peripheral FAs respectively. (D) Quantification of Sept-7 anisotropy,  $n = 20 - 21$  cells, and Sept-7 peripheral structure major axis length,  $n = 527 - 683$  puncta of MEFs plated on 0.1  $\mu\text{g/ml}$  FN (from 2B), and 0.1  $\mu\text{g/ml}$  FN + 1mM  $\text{MnCl}_2$ , with Mann-Whitney test.

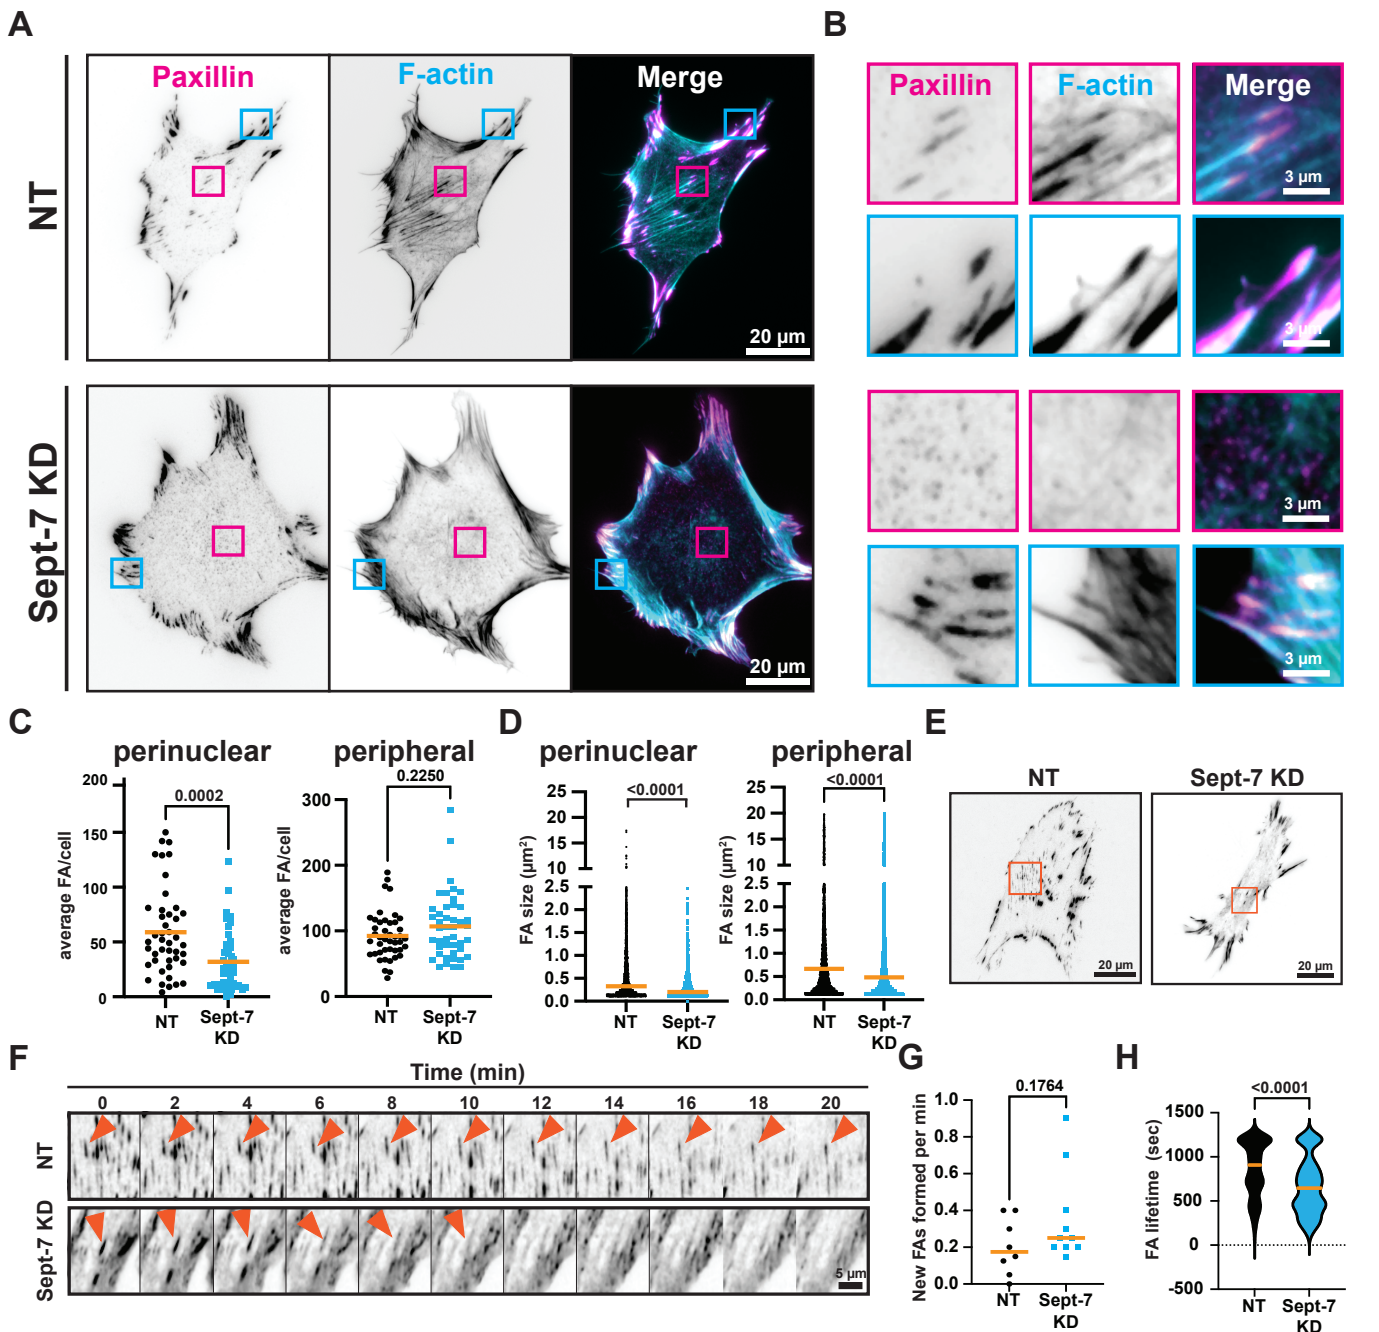

**Figure 3. Sept-7 promotes the maturation and stabilization of perinuclear FAs.** (A) TIRFM images show MEFs transfected with NT (top panels) or Sept-7 KD (lower panels) siRNA and labelled with paxillin (magenta) and F-actin (cyan), and merge, magenta and cyan boxes highlight perinuclear and peripheral FAs respectively. (B) ROIs of perinuclear (magenta) and peripheral (cyan) FAs from (A). (C) Quantification of average FA count per cell, and (D) FA size for perinuclear and peripheral FA sub-populations  $n = 44$  cells. (E) Live cell TIRFM image showing NT and Sept-7 KD MEFs transfected with mCherry-paxillin, orange boxes highlight perinuclear FA ROIs. (F) Montage of 20 min live cell TIRFM movie of perinuclear FAs of NT control (top) and Sept-7 KD (bottom) cells, orange arrows highlight an example FA over time. (G) Quantification of FA formation rate taken from kymograph quantification of live cell TIRFM videos,  $n = 4$  cells. (H) Quantification of minimum FA lifetime of NT and Sept-7 KD cells,  $n = 53-75$  FAs. All statistics performed using a Mann-Whitney test.

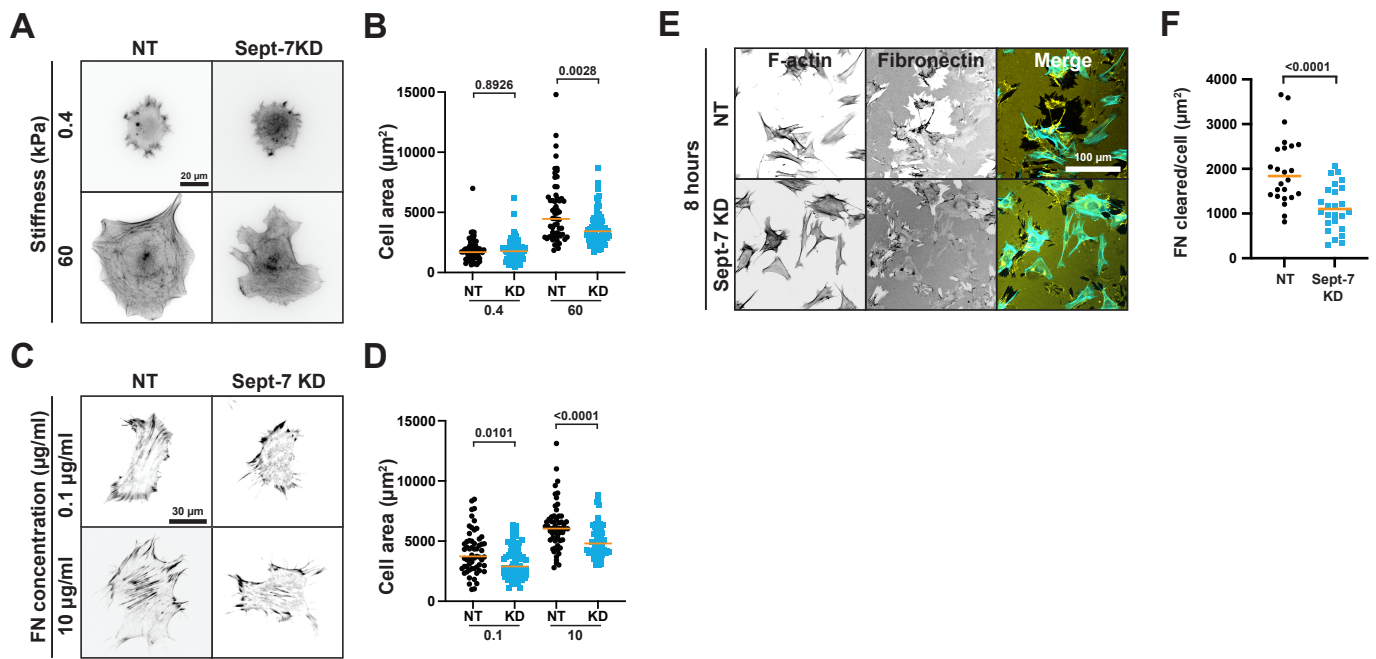

**Figure 4. SEPT-7 enhances sensitivity of cells to changes in ECM cues and contributes to ECM remodelling.**

(A) Epifluorescence images showing NT and Sept-7 KD MEFs stained with F-actin and plated on soft (0.4KPa), and stiff (60KPa) polyacrylamide gels. (B) Quantification of cell area for NT and Sept-7 KD cells on soft vs stiff gels,  $n = 59 - 61$  cells, with Kruskal-Wallis and Dunns multiple comparisons test. (C) TIRFM images of NT and Sept-7 KD of MEFs plated on low (0.1  $\mu\text{g/ml}$ ) and high (10  $\mu\text{g/ml}$ ) FN concentrations and co-stained with F-actin. (D) Quantification of cell area for NT and Sept-7 KD MEFs on low vs high FN concentrations,  $n = 59 - 61$  cells, with Kruskal-Wallis and Dunns multiple comparisons test. (E) Epifluorescence images showing NT and Sept-7 KD MEFs plated for 8 hr on 10  $\mu\text{g/ml}$  FN and co-stained with F-actin (cyan), and FN (yellow). (F) Quantification of the average area of FN clearance per cell in NT and Sept-7 KD cells,  $n = 24 - 25$  images, with Mann-Whitney test.

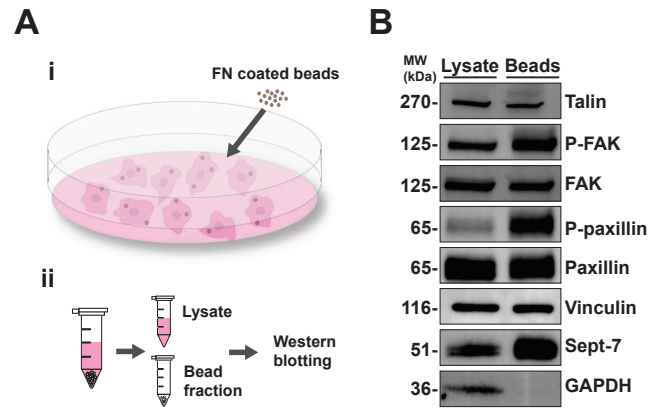

**Figure S1.** (A) Cartoon depicting magnetic bead-based FA isolation assay, (i) MEFs are cultured and incubated with 4.5  $\mu\text{m}$  magnetic beads coated with FN. (ii) After cell lysis, the bead fraction is isolated using magnetic separation. Subsequently, Western blotting is employed to probe for focal adhesion (FA) associated proteins. Western Blotting images showing talin, focal adhesion kinase (FAK), paxillin and phosphorylated FAK, paxillin and phosphorylated paxillin, vinculin, Sept-7 and GAPDH. Note: Vinculin, Sept-7 and GAPDH were run on a separate gel due to close molecular weights with other proteins.

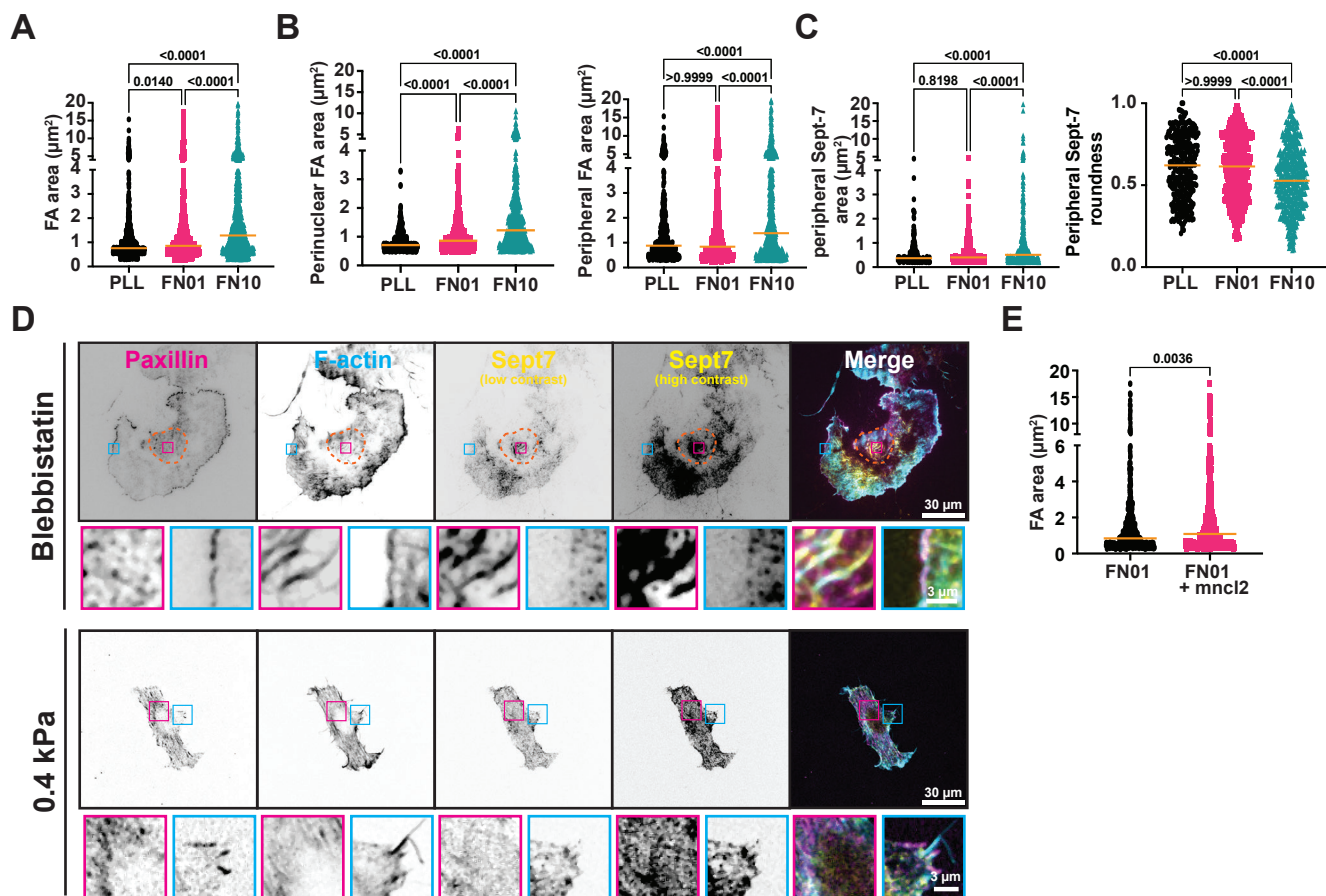

**Figure S2.** (A) Quantification of FA area of MEFs plated on PLL, 0.1  $\mu\text{g/ml}$  FN, and 10  $\mu\text{g/ml}$  FN,  $n = 860 - 1109$  FAs. (B) Quantification of FA area of MEFs plated on PLL, 0.1  $\mu\text{g/ml}$  FN, and 10  $\mu\text{g/ml}$  FN, separated by perinuclear FAs (left plot,  $n = 396 - 546$  FAs), and peripheral FAs (right plot,  $n = 434 - 560$  FAs). (C) Quantification of peripheral Sept-7 puncta area (left plot), and roundness (right plot), for MEFs plated on PLL, 0.1  $\mu\text{g/ml}$  FN, and 10  $\mu\text{g/ml}$  FN,  $n = 152 - 399$ . (D) TIRFM images show paxillin (magenta), F-actin (cyan), Sept-7 (yellow, low, and high contrast), and merge of MEFs plated on 10  $\mu\text{g/ml}$  FN and treated with blebbistatin (top panels), and 0.4 kPa gels coated with 10  $\mu\text{g/ml}$  FN (lower panels), magenta and cyan insets highlight perinuclear and peripheral FAs respectively. (E) Quantification of peripheral FA area of MEFs plated on 0.1  $\mu\text{g/ml}$  FN (data taken from S2B, right plot), and 0.1  $\mu\text{g/ml}$  FN + 1mM  $\text{MnCl}_2$   $n = 509 - 552$  FAs. Kruskal-Wallis and Dunns comparisons test (A, B, C, and D), Mann-Whitney test (E).

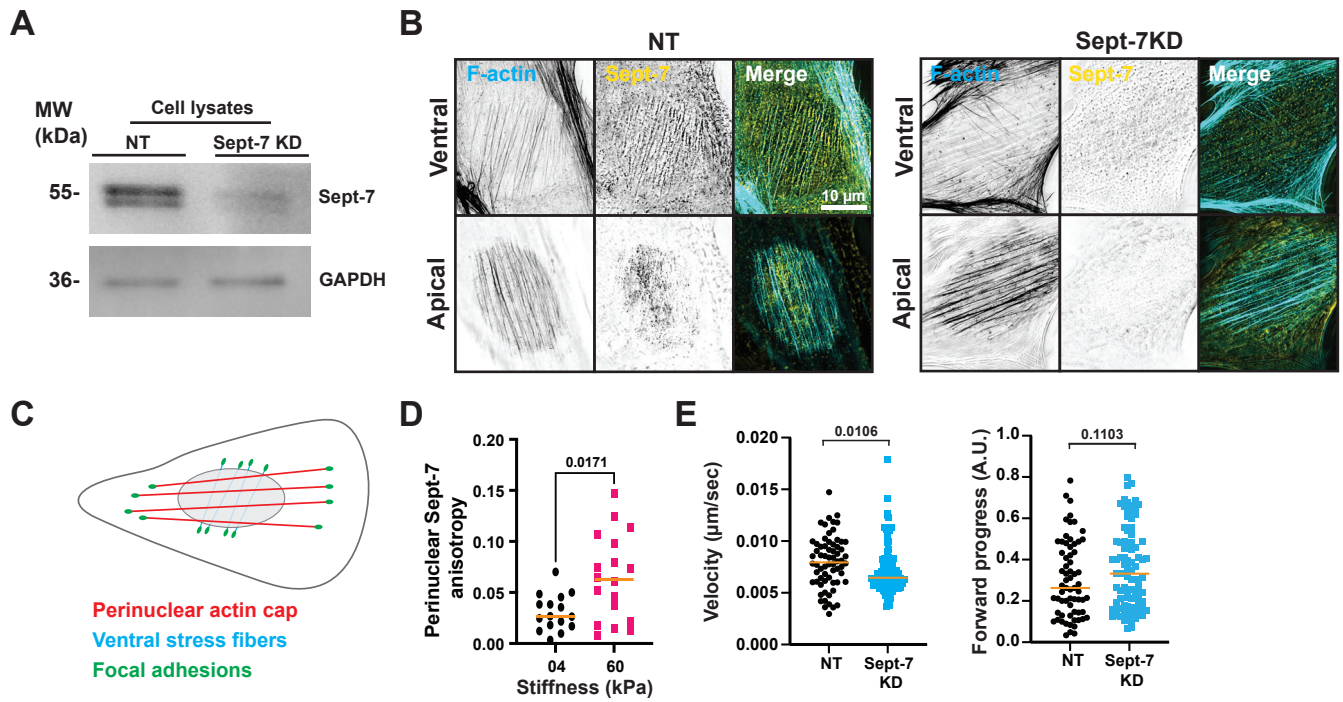

**Figure S3.** Representative Western Blotting images of cell lysates from MEFs showing Sept-7 and GAPDH after transfecting and incubating cells for 48 hours with NT or Sept-7 siRNA. (B) Representative 3D Structured Illumination Microscopy (SIM) images showing ventral SFs (ventral) and perinuclear actin cap (apical) of MEFs plated on 10  $\mu\text{g}/\text{ml}$  FN treated with NT or Sept-7 siRNA and stained for F-actin (cyan), Sept-7 (yellow), and merge. (C) Cartoon depicting perinuclear actin cap apical to the nucleus, ventral SFs ventral to the nucleus, and FAs, of MEFs. (D) Quantification of perinuclear Sept-7 anisotropy of MEFs plated on soft vs stiff gels,  $n = 16 - 18$  cells. (E) Quantification of cell velocity and forward progress of NT and Sept-7 KD cells imaged over 12 hr,  $n = 71 - 89$  cells. Statistics taken using a Mann-Whitney test.
